# Supplementary material for: Hidden intermediate activation: a concept to elucidate the reaction mechanism of the Schmittel cyclization of enyne–allenes
Source: Royal Society of Chemistry journal article supplement (doi:10.1039/d2cp04684a), 2022-11-11
Supplement: d2cp04684a1.pdf [file d2cp04684a1.pdf]

Electronic Supplementary Information

**Hidden Intermediate Activation: A Concept to Elucidate the Reaction Mechanism of the  
Schmittel Cyclization of Enyne-Allenes**

*Rocío Durán*<sup>\*,[a,b]</sup>, *César Barrales-Martínez*<sup>[c,d]</sup> and *Ricardo A. Matute*<sup>\*,[d,e]</sup>

---

[a] Centro de Bioinformática, Simulación y Modelado (CBSM)  
Facultad de Ingeniería  
Universidad de Talca  
Campus Lircay, Talca 3460000, Chile.  
E-mail: rocio.duran@utalca.cl

[b] Instituto de Investigación Interdisciplinaria (I<sup>3</sup>)  
Universidad de Talca  
Campus Lircay, Talca 3460000, Chile.

[c] Departamento de Química Orgánica y Físicoquímica  
Facultad de Ciencias Químicas y Farmacéuticas  
Universidad de Chile  
Sergio Livingstone 1007, Independencia, Santiago, Chile.

[d] Centro Integrativo de Biología y Química Aplicada (CIBQA)  
Universidad Bernardo O'Higgins  
Santiago 8370854, Chile.

[e] Division of Chemistry and Chemical Engineering  
California Institute of Technology  
Pasadena, California 91125, USA  
E-mail: rmatute@caltech.edu

---

*\* Corresponding author*

**Table of Contents**

|                                                                                            |     |
|--------------------------------------------------------------------------------------------|-----|
| 1. Computational Details .....                                                             | S2  |
| 2. Benchmark study .....                                                                   | S2  |
| 3. Reaction mechanism of the C <sup>2</sup> -C <sup>6</sup> enyne-allene cyclization ..... | S3  |
| 4. Substitution position study with electron-withdrawing groups .....                      | S6  |
| 5. Summary of quasiclassical molecular dynamics for CN-substituted<br>system.....          | S10 |
| 6. Cartesian Coordinates of the systems studied in this paper.....                         | S17 |
| 7. References.....                                                                         | S31 |

## 1. Computational Details

The calculations were made using the Density Functional Theory (DFT) study to consider the effects of exchange and correlation electronics in molecular systems. The hybrid GGA B3LYP functional<sup>[1,2]</sup> combined with the 6-311+G(d,p) basis was used for the stationary points. This functional was chosen because it is highly recommended for this type of reaction, fully agreeing with experimental data.<sup>[3,4]</sup> In addition, this functional was compared with high accuracy methods, such as SCS-MP2<sup>[5]</sup> and DLPND-CCSD(T)<sup>[6]</sup> for both activation and reaction energies (see Benchmark Study section). The harmonic vibrational analysis was carried out to confirm reactants and products as a minimum on the potential energy surface and the transition state (TS) as a first-order saddle point with a single negative eigenvalue on its Hessian matrix.<sup>[7]</sup> Transition state structures were related to reactants and products using the intrinsic reaction coordinate (IRC).<sup>[8-10]</sup> All calculations were performed in Gaussian 16 (G16)<sup>[11]</sup> software package, and the 3D and 2D potential energy surfaces (PESs) were optimized in the Orca 4.0.0.2<sup>[12]</sup> software package by scan method. Ab-initio molecular dynamics were carried out using the Born-Oppenheimer Molecular Dynamics (BOMD) procedure implemented in Gaussian 16 software at the uB3LYP/6-31g(d,p) level of theory. It was considered 256 trajectories in each reaction at 298K with a step-size of 0.25 amu<sup>1/2</sup>bohr (0.53 fs approx.). The simulations were performed up to 4000 steps (2.12 ps approx.); however, due to the possibility that the zero-point-energy in the normal modes leak out, we have considered meaningful trajectories up to 540 fs. Therefore, any trajectory that reached product in a period larger than 540 fs will be considered as unfinished. Force constants were updated every 12 steps. All trajectories were propagated using initial atomic position and velocities obtained by performing a normal mode sampling to the TS structure at 298 K in the forward and reverse direction. An inter-nuclear distance between the C2 and C6 threshold of 3.1 Å was used as the termination criterion of the reverse direction trajectories. Trajectories were classified into three groups: (i) *productive* if the reactant is reached in one direction and the product is formed in the other one, (ii) *unproductive* if the reactant or product is not formed in any of both directions, and (iii) *recrossing* if the trajectory starts and finish at the same structure of the PES (reactant or product).

All calculations were performed using an unrestricted protocol due to the biradical character of some structures. The visualization and generation of molecular structures were performed with the Chemcraft<sup>[13]</sup> program, and the figures were generated with the CYLview<sup>[14]</sup> software.

## 2. Benchmark study

The Benchmark study was a performance for DFT functionals, where three functionals were investigated: one-hybrid-GGA: B3LYP<sup>[1,15]</sup> (with and without dispersion correction), a hybrid-meta-GGA: M06-2X<sup>[16]</sup>, and a long-range corrected hybrid-GGA:  $\omega$ B97X-D3<sup>[17]</sup>, which were compared with the domain-based local pair-natural orbital DLPNO-CCSD(T)<sup>[6]</sup> and SCS-MP2 method in Orca 4.0.0.2<sup>[12]</sup> program.

The results are shown in Table S1, indicating that the B3LYP functional without dispersion correction is more comparable with the high-accuracy DLPNO-CCSD(T) and SCS-MP2 methods in both the activation energy and the reaction energy. Additionally, the B3LYP functional showed to be cheaper computationally.

**Table S1:** Reaction energy ( $\Delta E^\circ$ ), activation energy ( $\Delta E^\ddagger$ ), and time for one process that takes each method to complete the calculation.

| Method           | $\Delta E^\circ$ (kcal/mol) | $\Delta E^\ddagger$ (kcal/mol) | Time for one processor (minutes) |
|------------------|-----------------------------|--------------------------------|----------------------------------|
| B3LYP            | -50.9                       | 27.4                           | 2916                             |
| B3LYP-D3         | -49.3                       | 20.3                           | 3238                             |
| M06-2X           | -48.2                       | 30.1                           | 1168                             |
| $\omega$ B97X-D3 | -50.9                       | 30.5                           | 7728                             |
| DLPNO-CCSD(T)    | -50.8                       | 28.7                           | 1408                             |
| SCS-MP2          | -49.3                       | 26.7                           | 388608                           |

### 3. Reaction mechanism of the C<sup>2</sup>-C<sup>6</sup> enyne-allene cyclization

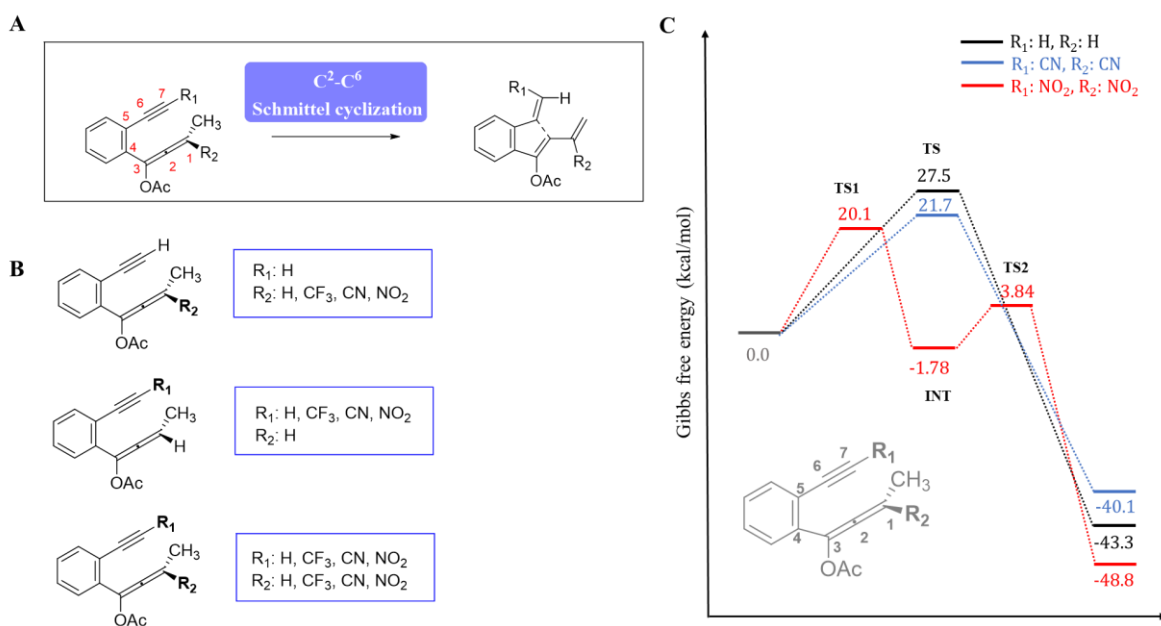

**Scheme S1:** A) C<sup>2</sup>-C<sup>6</sup> cyclization of enyne-allenes reaction, known as Schmitt reaction. B) three substitution patterns were studied. C) Gibbs free energy diagram for the three cyclizations studied.

Three electron-withdrawing substituents were considered: CF<sub>3</sub>, CN, and NO<sub>2</sub>, in R1 and R2 positions in enyne–allene (Scheme S1). Three substitutions patterns were studied; (i) R1: H, R2: H/CF<sub>3</sub>/CN/NO<sub>2</sub>; (ii) R1: H/CF<sub>3</sub>/CN/NO<sub>2</sub>, R2: H, and (iii) R1, R2: H/CF<sub>3</sub>/CN/NO<sub>2</sub>, this last one as doubly substituted with the same group/atom. Based on the reaction force constant profiles,<sup>[18,19]</sup> the mechanism of all reactions has been classified as either synchronous or asynchronous. On the one hand, for the first substitution pattern, it was found that the mechanism follows a one-step pathway involving simultaneous C2-C6 and C7-H bond stretching. On the other hand, a transition from synchronous to asynchronous was found when the substituent changed from H to NO<sub>2</sub>, fully asynchronous when R2 was replaced with the NO<sub>2</sub> group. For the second substitution pattern, the pathway changes from one-step (synchronous or asynchronous) to stepwise as the EWG power of the substituent increases. Incorporating attractor groups entails a more substantial intermediate stabilization for the third substitution pattern, so this pattern is better suitable for assessing the DMIS.

Figure S1-A shows the representation of the mechanism that reactions follow with the three substituents, where non-substituted enyne–allene reaction takes place by a one-step pathway (black line). The shape of the energy profile of this system (Fig. S1-B) is characteristic of that taking place in one elemental step, where the transition state for this mechanism presents bond distances of 2.04 Å and 1.63 Å for C2-C6 and C7-H (Fig. S1-B), respectively, which are the bonds that are forming in the reaction, being these chemical events fully coupled). In the case of enyne–allenes substituted with NO<sub>2</sub> groups, both chemical events are decoupled, generating a stepwise mechanism (Fig. S1). The first transition state involves the C2-C6 bond stretching as vibrational mode, leading to the intermediate formation, and in the latter, the hydrogen transfer takes place. The intermediate formation is the rate-determining step in this case. A different situation is found with the CN group (blue line in Fig. S1-A), where the shape of the energy profile is unusual (Fig. S1-B), presenting a shoulder after the transition state. This shoulder gives enough information to think that the mechanism is different from enyne–allene without substituents.

On the other hand, if we pay attention to bond distances at the TS structure, it is found that the bond formation is partially uncoupling, where the C7-H bond, related to the hydrogen transfer, increases to 2.28 Å (Fig. S1-C), accounting for the partial decoupling of both chemical events. Additionally, from the DMIS perspective, the shoulder can be related to the appearance of a partially hidden intermediate. In this way, it is possible to suggest that cyano groups in R1 and R2 stabilize the intermediate enough to appear in the energy profile, but it is not enough to appear as a formal intermediate (local minimum). Finally, the red line represents the substitution with the nitro group. In this case, the reaction's pathway is stepwise, where two transition states are found. The first is related to C2-C6 bond formation and the second to H-shift. The first transition state shows bond distances of 1.99 Å and 3.51 Å, which indicates the total decoupling of both events. Therefore, the nitro group in R1 and R2 generates a complete stabilization of the intermediate, resulting in the appearance of an explicit intermediate in the PES.

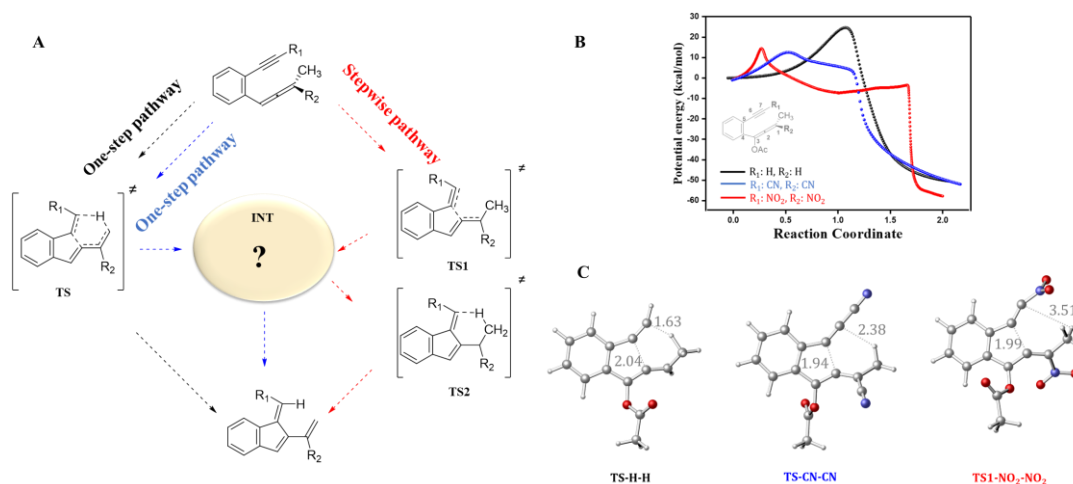

**Figure S1:** A) Schematic representation of one-step and stepwise mechanisms. B) Potential energy profile for three reactions studied (energy is in kcal/mol). C) Transition state structures for the three reactions (bond distances are in Å).

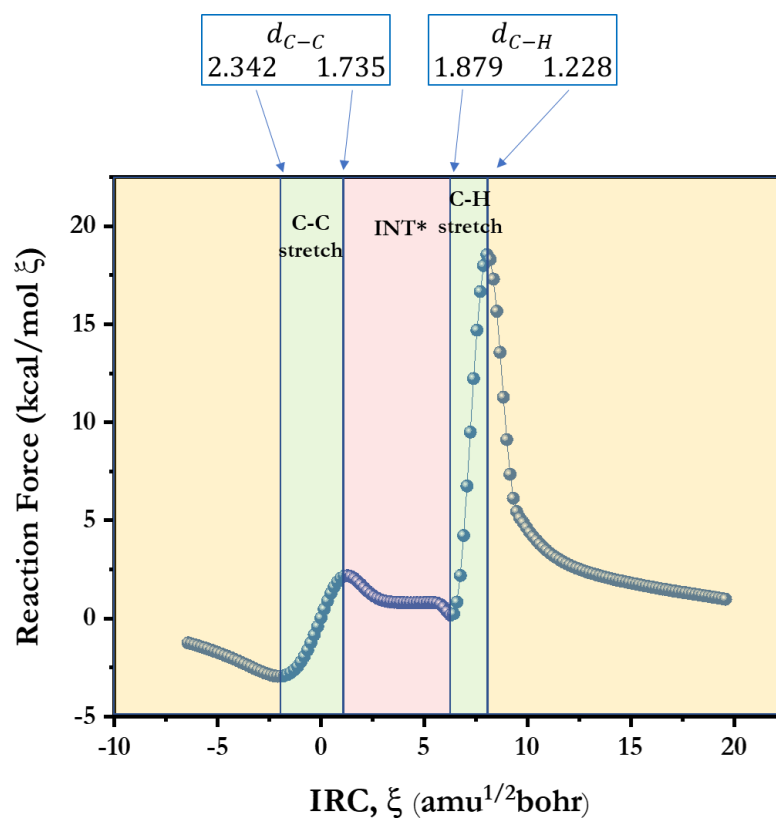

**Figure S2:** Reaction Force Analysis (RFA)<sup>[20,21]</sup> of the IRC for the title reaction of the system with CN substituents. The RFA allowed the definition of the borders of the transition state zones.

#### 4. Substitution position study with electron-withdrawing groups

##### Case 1

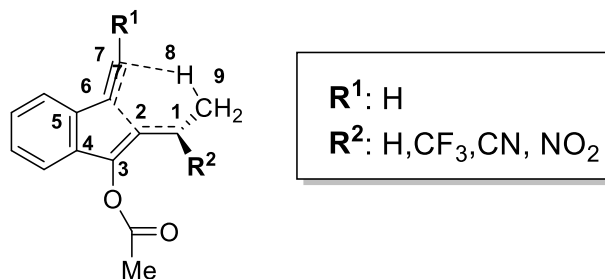

**Table S2:** Activation energy ( $\Delta E^\ddagger$ ), reaction energy ( $\Delta E^\circ$ ), and mechanism type for case study 1 in UB3LYP/6-31G(d,p). The R1 position is unsubstituted; while the R2 position is substituted with CF<sub>3</sub>, CN, and NO<sub>2</sub> electron-withdrawing groups, the energies value is in kcal/mol.

| System            | $\Delta E^\ddagger$ | $\Delta E^\circ$ | Mechanism             |
|-------------------|---------------------|------------------|-----------------------|
| H-H               | 24.61               | -50.46           | Synchronous one-step  |
| H-CF <sub>3</sub> | 23.39               | -50.21           | Synchronous one-step  |
| H-CN              | 21.92               | -46.08           | Synchronous one-step  |
| H-NO <sub>2</sub> | 17.82               | -54.65           | Asynchronous one-step |

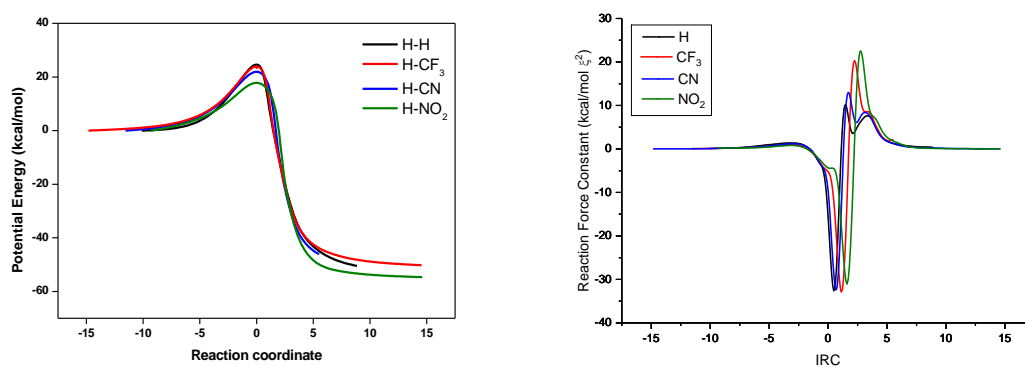

**Figure S3:** Potential energy (left) and reaction force constant (right) profiles for case study 1 in UB3LYP/6-31G(d,p). The R1 position is unsubstituted, while the R2 position is substituted with CF<sub>3</sub>, CN, and NO<sub>2</sub> electron-withdrawing groups.

## Case 2

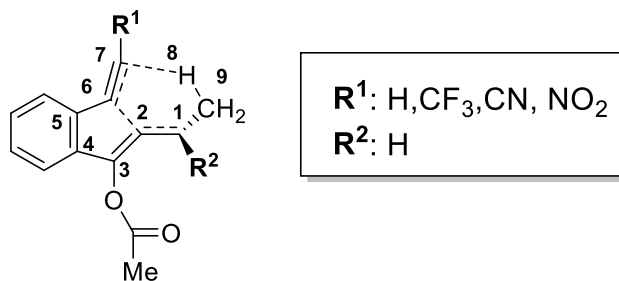

**Table S3:** Activation energy ( $\Delta E^\ddagger$ ), reaction energy ( $\Delta E^\circ$ ), and mechanism type for case study 2 in UB3LYP/6-31G(d,p). The R1 position is substituted with CF<sub>3</sub>, CN, and NO<sub>2</sub> electron-withdrawing groups, while the R2 position is unsubstituted. The energy value is in kcal/mol.

| System             | $\Delta E^\ddagger$ | $\Delta E^\circ$ | Mechanism             |
|--------------------|---------------------|------------------|-----------------------|
| H-H                | 24.61               | -50.46           | Synchronous one-step  |
| CF <sub>3</sub> -H | 22.96               | -47.71           | Synchronous one-step  |
| CN-H (TS1)         | 21.26               | -45.06           | Stepwise              |
| NO <sub>2</sub> -H | 18.71               | -55.61           | Asynchronous one-step |

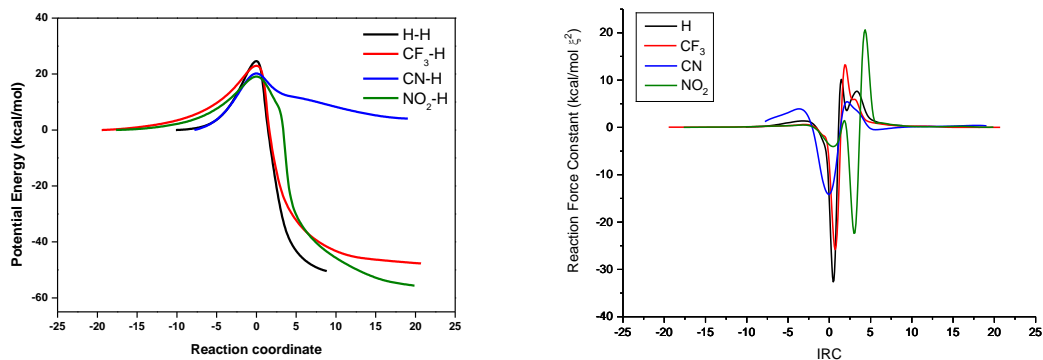

**Figure S4.** Potential energy (left) and reaction force constant (right) profiles for case study 2 in UB3LYP/6-31G(d,p). The R1 position is substituted with CF<sub>3</sub>, CN, and NO<sub>2</sub> electron-withdrawing groups, while the R2 position is unsubstituted.

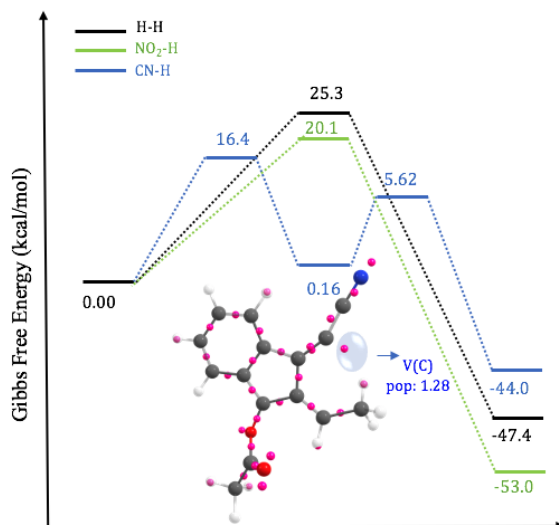

**Figure S5:** Gibbs free energy Diagram for case study 2 in UB3LYP/6-31G(d,p). The R1 position is substituted with CF<sub>3</sub>, CN, and NO<sub>2</sub> electron-withdrawing groups, while the R2 position is unsubstituted. Basin attractors of the Electron Localization Function (ELF) for the intermediate (R1: H, R2: CN) and the population of the carbon basin are highlighted in blue.

### Case 3

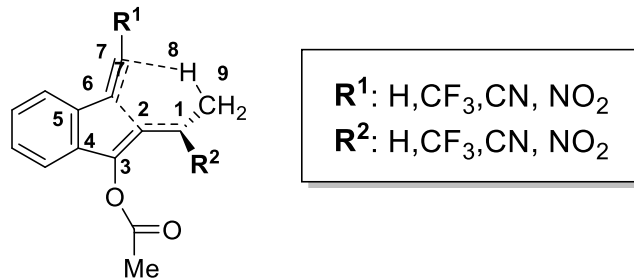

**Table S4:** Activation energy ( $\Delta E^\ddagger$ ), reaction energy ( $\Delta E^\circ$ ), and mechanism type for case study 3 in UB3LYP/6-31G(d,p). The R1 and R2 positions are substituted with CF<sub>3</sub>, CN, and NO<sub>2</sub> electron-withdrawing groups. The energy value is in kcal/mol.

| System                                 | $\Delta E^\ddagger$ | $\Delta E^\circ$ | Mechanism             |
|----------------------------------------|---------------------|------------------|-----------------------|
| H-H                                    | 24.61               | -50.46           | Synchronous one-step  |
| CF <sub>3</sub> - CF <sub>3</sub>      | 22.82               | -47.68           | Asynchronous one-step |
| CN-CN                                  | 13.30               | -49.22           | Asynchronous one-step |
| NO <sub>2</sub> -NO <sub>2</sub> (TS1) | 16.4                | -55.7            | Stepwise              |



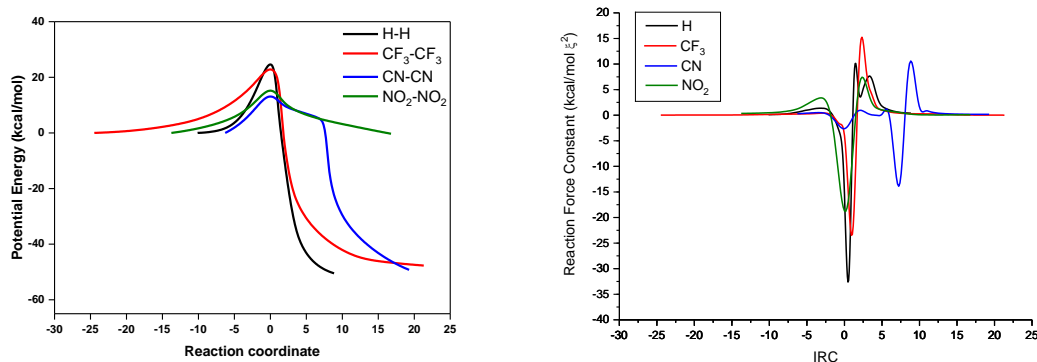

**Figure S6:** Potential energy (left) and reaction force constant (right) profiles for case study 2 in UB3LYP/6-31G(d,p). The R1 and R2 positions are substituted with CF<sub>3</sub>, CN, and NO<sub>2</sub> electron-withdrawing groups.

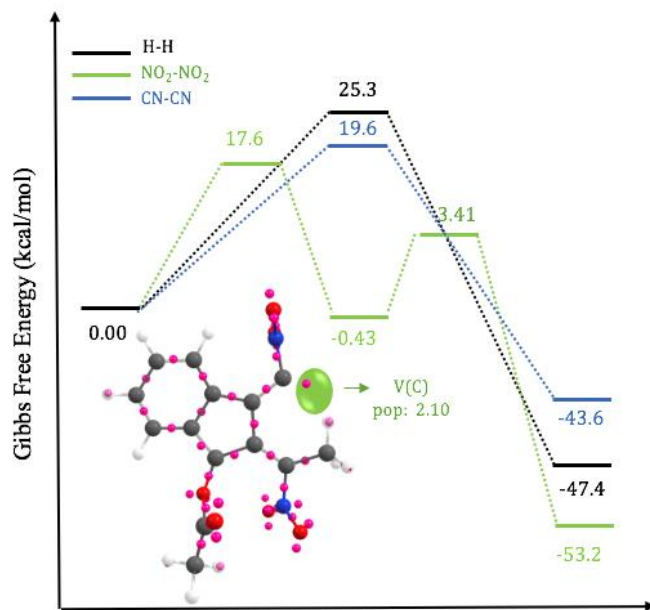

**Figure S7:** Gibbs free energy Diagram for case study 3 in UB3LYP/6-31G(d,p). The R1 and R2 positions are substituted with CF<sub>3</sub>, CN, and NO<sub>2</sub> electron-withdrawing groups. Basin attractors of the Electron Localization Function (ELF) for the intermediate (R1: NO<sub>2</sub>, R2: NO<sub>2</sub>) and the population of the carbon basin are highlighted in green.

**Table S5.** Natural atomic charges of the atoms that form the new bonds C2-C6 and C7-H.

|    | -H     | -CN    | -NO <sub>2</sub> |
|----|--------|--------|------------------|
| C2 | -0.043 | -0.022 | -0.059           |
| C6 | -0.047 | 0.014  | -0.045           |
| C7 | -0.284 | -0.068 | 0.163            |
| H  | 0.251  | 0.268  | 0.272            |

**5. Summary of quasiclassical molecular dynamics for system R1 and R2 positions CN substituted**

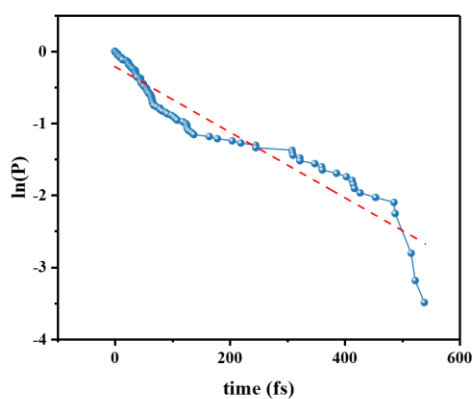

**Figure S8:**  $\ln(P)$  vs. Time plot. The linear fitted function is:  $\ln(P) = -0.0046t - 0.213$ ;  $R^2=0.91$ .

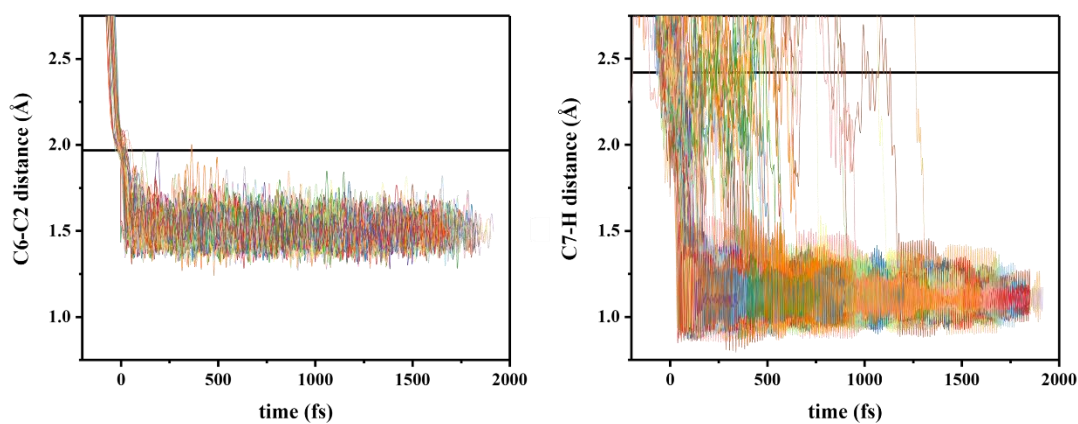

**Figure S9:** Time evolution of two bond distances of interest.

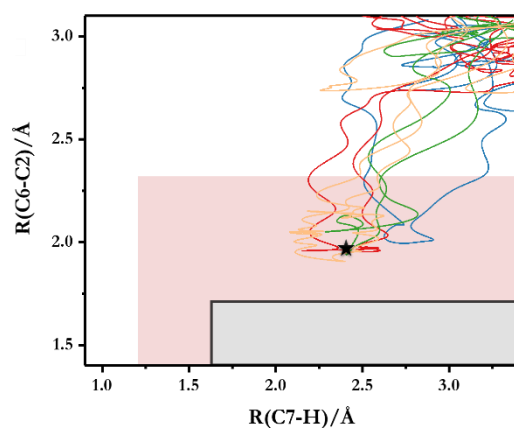

**Figure S10:** Some of the trajectories that showed recrossing. None of them visited the intermediate region (shown in the grey square).

**Table S6.** Trajectories, type of trajectory (**p**: productive, **uf**: unfinished, **r**: recrossing and **np**: non-productive), the internuclear distance of two bonds of interest at the sampled structure ( $d_{C-C}$  and  $d_{C-H}$ ), time of entrance in the intermediate region ( $t_{start-RI}$ ), time of departure from the intermediate region ( $t_{end-RI}$ ) and intermediate lifetime ( $t_{life-RI}$ ).

| Trajectory | Type | $d_{C-C}$ | $d_{C-H}$ | $t_{start-RI}$ | $t_{end-RI}$ | $t_{life-RI}$ |
|------------|------|-----------|-----------|----------------|--------------|---------------|
| 1          | p    | 2.067     | 2.779     | 45             | 463          | 418           |
| 2          | p    | 1.926     | 2.524     | 29             | 109          | 79            |
| 3          | p    | 2.083     | 2.540     | 2              | 53           | 52            |
| 4          | p    | 2.011     | 2.736     | 15             | 179          | 165           |
| 5          | p    | 2.067     | 2.379     | 37             | 92           | 55            |
| 6          | p    | 1.987     | 2.519     | 50             | 373          | 323           |
| 7          | p    | 1.958     | 2.703     | 17             | 421          | 404           |
| 8          | p    | 2.007     | 2.274     | 28             | 36           | 8             |
| 9          | p    | 1.933     | 2.923     | 23             | 53           | 31            |
| 10         | p    | 2.033     | 2.505     | 21             | 41           | 20            |
| 11         | p    | 2.050     | 2.406     | 31             | 169          | 138           |
| 12         | p    | 1.914     | 2.331     | 38             | 259          | 220           |
| 13         | p    | 1.942     | 2.544     | 22             | 141          | 119           |
| 14         | p    | 1.974     | 2.232     | 23             | 61           | 39            |
| 15         | p    | 1.948     | 3.299     | 13             | 91           | 79            |
| 16         | p    | 1.914     | 2.597     | 12             | 322          | 310           |
| 17         | p    | 2.010     | 2.268     | 46             | 105          | 59            |
| 18         | p    | 2.025     | 2.704     | 23             | 96           | 73            |
| 19         | p    | 2.005     | 2.168     | 33             | 35           | 2             |
| 20         | p    | 2.000     | 2.577     | 19             | 102          | 83            |
| 21         | p    | 1.980     | 2.572     | 20             | 329          | 309           |
| 22         | p    | 2.003     | 2.528     | 23             | 150          | 127           |
| 23         | p    | 1.996     | 2.549     | 34             | 558          | 524           |
| 24         | p    | 2.004     | 2.248     | 19             | 43           | 24            |

|    |   |       |       |    |     |     |
|----|---|-------|-------|----|-----|-----|
| 25 | p | 2.018 | 2.571 | 17 | 503 | 487 |
| 26 | p | 2.095 | 2.539 | 57 | 93  | 36  |
| 27 | p | 2.074 | 2.161 | 27 | 273 | 246 |
| 28 | p | 1.999 | 2.510 | 43 | 94  | 50  |
| 29 | p | 2.075 | 2.164 | 28 | 73  | 45  |
| 30 | p | 1.992 | 2.401 | 51 | 59  | 9   |
| 31 | p | 2.001 | 2.423 | 58 | 82  | 24  |
| 32 | p | 2.088 | 2.247 | 37 | 73  | 36  |
| 33 | p | 1.995 | 2.308 | 28 | 137 | 109 |
| 34 | p | 1.991 | 2.286 | 26 | 90  | 64  |
| 35 | p | 2.006 | 2.298 | 21 | 67  | 46  |
| 36 | p | 1.965 | 2.282 | 22 | 24  | 1   |
| 37 | p | 2.001 | 2.367 | 32 | 96  | 65  |
| 38 | p | 2.071 | 2.689 | 22 | 121 | 99  |
| 39 | p | 1.965 | 3.196 | 12 | 335 | 323 |
| 40 | p | 1.965 | 2.024 | 48 | 60  | 12  |
| 41 | p | 1.943 | 2.324 | 32 | 487 | 455 |
| 42 | p | 2.065 | 2.144 | 30 | 210 | 179 |
| 43 | p | 1.990 | 2.404 | 17 | 54  | 37  |
| 44 | p | 2.075 | 2.560 | 45 | 357 | 311 |
| 45 | p | 1.957 | 2.318 | 18 | 25  | 7   |
| 46 | p | 2.025 | 2.333 | 24 | 38  | 14  |
| 47 | p | 1.915 | 2.658 | 16 | 222 | 205 |
| 48 | p | 2.013 | 2.810 | 46 | 59  | 12  |
| 49 | p | 1.983 | 2.681 | 24 | 86  | 62  |
| 50 | p | 1.960 | 1.695 | 38 | 94  | 56  |
| 51 | p | 2.090 | 2.765 | 33 | 160 | 126 |
| 52 | p | 1.969 | 2.353 | 35 | 62  | 27  |
| 53 | p | 1.919 | 2.149 | 38 | 104 | 66  |
| 54 | p | 2.028 | 2.437 | 34 | 71  | 37  |
| 55 | p | 2.026 | 2.999 | 72 | 94  | 21  |
| 56 | p | 1.933 | 2.356 | 29 | 75  | 46  |
| 57 | p | 2.008 | 2.206 | 24 | 69  | 45  |
| 58 | p | 2.074 | 2.161 | 27 | 273 | 246 |
| 59 | p | 1.999 | 2.510 | 43 | 94  | 50  |
| 60 | p | 2.075 | 2.164 | 28 | 73  | 45  |
| 61 | p | 1.974 | 2.496 | 40 | 528 | 489 |
| 62 | p | 1.990 | 2.464 | 26 | 48  | 23  |
| 63 | p | 2.016 | 2.166 | 23 | 48  | 25  |
| 64 | p | 2.093 | 2.590 | 24 | 69  | 45  |
| 65 | p | 2.032 | 2.556 | 33 | 98  | 65  |
| 66 | p | 1.905 | 2.480 | 9  | 425 | 416 |
| 67 | p | 1.990 | 2.711 | 24 | 63  | 39  |
| 68 | p | 1.994 | 2.483 | 23 | 59  | 36  |
| 69 | p | 1.960 | 3.032 | 17 | 557 | 540 |
| 70 | p | 1.940 | 2.552 | 34 | 39  | 5   |
| 71 | p | 1.930 | 2.801 | 15 | 377 | 362 |
| 72 | p | 1.988 | 2.269 | 23 | 157 | 134 |
| 73 | p | 1.873 | 2.711 | 9  | 396 | 387 |

|     |    |       |       |    |      |      |
|-----|----|-------|-------|----|------|------|
| 74  | p  | 2.011 | 2.522 | 27 | 84   | 56   |
| 75  | p  | 1.971 | 2.102 | 37 | 72   | 34   |
| 76  | p  | 1.942 | 1.905 | 22 | 25   | 3    |
| 77  | p  | 1.967 | 2.748 | 29 | 443  | 414  |
| 78  | p  | 2.029 | 2.310 | 43 | 80   | 38   |
| 79  | p  | 2.057 | 2.032 | 17 | 82   | 66   |
| 80  | p  | 2.084 | 2.557 | 26 | 94   | 68   |
| 81  | p  | 2.080 | 2.310 | 29 | 79   | 50   |
| 82  | p  | 2.048 | 2.221 | 39 | 75   | 36   |
| 83  | p  | 2.056 | 2.645 | 24 | 81   | 57   |
| 84  | p  | 2.001 | 2.232 | 21 | 127  | 106  |
| 85  | p  | 2.084 | 2.378 | 35 | 59   | 24   |
| 86  | p  | 2.018 | 2.273 | 35 | 64   | 29   |
| 87  | p  | 1.990 | 2.307 | 24 | 87   | 64   |
| 88  | p  | 2.005 | 1.967 | 21 | 89   | 68   |
| 89  | p  | 1.981 | 2.423 | 32 | 37   | 5    |
| 90  | p  | 2.054 | 2.753 | 21 | 113  | 92   |
| 91  | p  | 1.935 | 2.406 | 12 | 360  | 349  |
| 92  | p  | 1.997 | 2.189 | 39 | 102  | 63   |
| 93  | p  | 1.956 | 2.449 | 55 | 81   | 27   |
| 94  | p  | 2.043 | 1.884 | 21 | 35   | 14   |
| 95  | p  | 2.033 | 2.047 | 17 | 141  | 124  |
| 96  | p  | 2.060 | 2.779 | 35 | 165  | 129  |
| 97  | p  | 1.975 | 2.183 | 27 | 388  | 361  |
| 98  | p  | 1.952 | 2.501 | 29 | 88   | 59   |
| 99  | p  | 1.967 | 2.289 | 28 | 153  | 126  |
| 100 | p  | 1.995 | 2.541 | 22 | 53   | 30   |
| 101 | p  | 1.994 | 2.358 | 47 | 475  | 428  |
| 102 | p  | 2.024 | 2.179 | 27 | 116  | 89   |
| 103 | p  | 2.043 | 1.745 | 32 | 136  | 103  |
| 104 | p  | 2.009 | 2.391 | 20 | 537  | 517  |
| 105 | p  | 2.034 | 2.522 | 30 | 34   | 5    |
| 106 | uf | 1.951 | 2.485 | 18 | 560  | 542  |
| 107 | uf | 1.905 | 2.794 | 10 | 1100 | 1090 |
| 108 | uf | 1.908 | 2.109 | 18 | 1163 | 1145 |
| 109 | uf | 2.008 | 2.166 | 57 | 1305 | 1248 |
| 110 | uf | 1.992 | 2.573 | 25 | 568  | 543  |
| 111 | uf | 1.917 | 2.645 | 15 | 904  | 889  |
| 112 | uf | 1.913 | 2.332 | 56 | 762  | 706  |
| 113 | uf | 1.921 | 1.992 | 26 | 635  | 609  |
| 114 | uf | 2.020 | 2.485 | 19 | 891  | 872  |
| 115 | uf | 2.070 | 1.783 | 21 | 949  | 929  |
| 116 | uf | 1.912 | 2.327 | 31 | 1911 | 1880 |
| 117 | uf | 1.979 | 2.563 | 18 | 1994 | 1976 |
| 118 | uf | 1.943 | 2.571 | 12 | 1645 | 1633 |
| 119 | uf | 1.855 | 3.032 | 45 | 1697 | 1652 |
| 120 | uf | 2.066 | 2.773 | 15 | 1892 | 1877 |
| 121 | uf | 1.940 | 2.999 | 30 | 2099 | 2069 |
| 122 | uf | 2.000 | 2.288 | 26 | 2046 | 2020 |

|     |    |       |       |    |      |      |
|-----|----|-------|-------|----|------|------|
| 123 | uf | 1.942 | 2.673 | 13 | 1928 | 1916 |
| 124 | uf | 2.007 | 2.592 | 18 | 1870 | 1852 |
| 125 | uf | 1.928 | 2.266 | 15 | 1968 | 1953 |
| 126 | uf | 1.972 | 2.301 | 14 | 1563 | 1549 |
| 127 | uf | 1.895 | 2.453 | 12 | 1564 | 1552 |
| 128 | uf | 1.973 | 2.287 | 52 | 1495 | 1443 |
| 129 | uf | 1.905 | 2.619 | 9  | 1833 | 1824 |
| 130 | uf | 1.886 | 2.580 | 15 | 1788 | 1774 |
| 131 | uf | 1.959 | 2.492 | 19 | 2002 | 1983 |
| 132 | uf | 1.953 | 2.368 | 12 | 1878 | 1867 |
| 133 | uf | 1.946 | 2.599 | 15 | 2069 | 2054 |
| 134 | uf | 1.933 | 2.570 | 11 | 2074 | 2062 |
| 135 | uf | 1.899 | 2.529 | 12 | 1649 | 1636 |
| 136 | uf | 1.878 | 2.329 | 7  | 1968 | 1961 |
| 137 | uf | 1.855 | 2.421 | 9  | 1835 | 1826 |
| 138 | uf | 2.035 | 2.640 | 22 | 2002 | 1980 |
| 139 | uf | 1.945 | 2.293 | 19 | 1666 | 1647 |
| 140 | uf | 1.917 | 2.419 | 23 | 1655 | 1632 |
| 141 | uf | 1.993 | 2.492 | 18 | 1871 | 1853 |
| 142 | uf | 1.953 | 2.586 | 15 | 2015 | 2000 |
| 143 | uf | 1.860 | 2.767 | 9  | 1546 | 1536 |
| 144 | uf | 2.057 | 2.348 | 13 | 1337 | 1324 |
| 145 | uf | 1.907 | 2.338 | 15 | 1717 | 1702 |
| 146 | uf | 1.873 | 2.751 | 26 | 1399 | 1373 |
| 147 | uf | 1.966 | 2.419 | 29 | 1688 | 1658 |
| 148 | uf | 1.996 | 2.733 | 27 | 1873 | 1846 |
| 149 | uf | 1.957 | 2.726 | 18 | 1793 | 1775 |
| 150 | uf | 1.914 | 2.576 | 15 | 1935 | 1920 |
| 151 | uf | 2.012 | 2.780 | 17 | 1755 | 1738 |
| 152 | uf | 1.884 | 2.864 | 10 | 2019 | 2009 |
| 153 | uf | 2.086 | 2.549 | 39 | 1934 | 1895 |
| 154 | uf | 1.906 | 2.615 | 9  | 1721 | 1712 |
| 155 | uf | 1.932 | 2.842 | 9  | 1668 | 1659 |
| 156 | uf | 1.875 | 2.264 | 12 | 1946 | 1934 |
| 157 | uf | 1.902 | 2.636 | 11 | 1861 | 1850 |
| 158 | uf | 1.996 | 2.699 | 18 | 1812 | 1794 |
| 159 | uf | 1.967 | 2.874 | 9  | 1703 | 1694 |
| 160 | uf | 1.969 | 2.479 | 18 | 1522 | 1504 |
| 161 | uf | 1.893 | 2.783 | 14 | 1561 | 1547 |
| 162 | uf | 1.935 | 2.323 | 11 | 1918 | 1907 |
| 163 | uf | 1.789 | 2.558 | 6  | 1884 | 1878 |
| 164 | uf | 1.954 | 2.156 | 21 | 1997 | 1976 |
| 165 | uf | 2.001 | 2.576 | 15 | 1767 | 1752 |
| 166 | uf | 1.989 | 2.181 | 16 | 1761 | 1744 |
| 167 | uf | 1.885 | 2.664 | 11 | 1624 | 1614 |
| 168 | uf | 1.953 | 2.560 | 12 | 1745 | 1733 |
| 169 | uf | 1.827 | 2.309 | 7  | 1765 | 1758 |
| 170 | uf | 2.043 | 2.319 | 19 | 1770 | 1751 |
| 171 | uf | 1.860 | 2.939 | 13 | 1918 | 1905 |

|     |    |       |       |    |      |      |
|-----|----|-------|-------|----|------|------|
| 172 | uf | 2.003 | 2.398 | 28 | 1759 | 1730 |
| 173 | uf | 2.049 | 2.821 | 27 | 1842 | 1815 |
| 174 | uf | 1.940 | 2.258 | 23 | 1991 | 1968 |
| 175 | uf | 1.918 | 2.198 | 21 | 1791 | 1770 |
| 176 | uf | 1.951 | 2.890 | 12 | 1325 | 1313 |
| 177 | uf | 1.897 | 2.197 | 16 | 1690 | 1674 |
| 178 | uf | 2.029 | 2.944 | 32 | 1658 | 1626 |
| 179 | uf | 1.913 | 2.380 | 20 | 1378 | 1358 |
| 180 | uf | 1.935 | 2.997 | 14 | 1915 | 1900 |
| 181 | uf | 1.986 | 2.743 | 15 | 1609 | 1594 |
| 182 | uf | 1.880 | 2.451 | 10 | 2010 | 2000 |
| 183 | uf | 1.831 | 2.575 | 10 | 1926 | 1915 |
| 184 | uf | 1.905 | 2.798 | 9  | 1741 | 1732 |
| 185 | uf | 1.976 | 2.492 | 23 | 1953 | 1930 |
| 186 | uf | 1.878 | 2.296 | 15 | 1948 | 1934 |
| 187 | uf | 1.939 | 2.625 | 27 | 1775 | 1748 |
| 188 | uf | 1.909 | 2.067 | 40 | 1983 | 1944 |
| 189 | uf | 1.913 | 2.380 | 12 | 1974 | 1962 |
| 190 | uf | 1.994 | 2.384 | 13 | 1982 | 1970 |
| 191 | uf | 1.932 | 2.842 | 9  | 1668 | 1659 |
| 192 | uf | 1.875 | 2.264 | 12 | 1946 | 1934 |
| 193 | uf | 1.992 | 2.401 | 46 | 2199 | 2153 |
| 194 | uf | 1.902 | 2.636 | 11 | 2145 | 2134 |
| 195 | uf | 1.996 | 2.699 | 18 | 2335 | 2317 |
| 196 | uf | 1.967 | 2.874 | 9  | 1798 | 1789 |
| 197 | uf | 1.963 | 2.513 | 16 | 1382 | 1366 |
| 198 | uf | 2.011 | 2.127 | 15 | 2665 | 2650 |
| 199 | uf | 1.989 | 2.634 | 33 | 1960 | 1928 |
| 200 | uf | 1.996 | 2.612 | 33 | 1441 | 1407 |
| 201 | uf | 1.916 | 2.577 | 16 | 1962 | 1947 |
| 202 | uf | 1.907 | 2.405 | 20 | 1995 | 1974 |
| 203 | uf | 1.941 | 2.802 | 21 | 1885 | 1864 |
| 204 | uf | 2.073 | 2.288 | 23 | 1562 | 1539 |
| 205 | uf | 1.916 | 2.537 | 27 | 1945 | 1918 |
| 206 | uf | 1.968 | 2.325 | 31 | 2040 | 2009 |
| 207 | uf | 1.946 | 1.999 | 21 | 1688 | 1668 |
| 208 | uf | 1.958 | 2.452 | 15 | 1890 | 1875 |
| 209 | uf | 1.970 | 2.291 | 25 | 2727 | 2702 |
| 210 | uf | 1.856 | 2.638 | 7  | 2142 | 2135 |
| 211 | uf | 1.907 | 2.733 | 15 | 1884 | 1869 |
| 212 | uf | 1.998 | 2.490 | 48 | 1341 | 1293 |
| 213 | uf | 1.941 | 2.437 | 23 | 1627 | 1604 |
| 214 | uf | 1.997 | 2.468 | 14 | 1631 | 1616 |
| 215 | uf | 1.910 | 2.387 | 14 | 1628 | 1613 |
| 216 | uf | 1.917 | 2.516 | 17 | 1976 | 1959 |
| 217 | uf | 1.931 | 2.182 | 12 | 1657 | 1645 |
| 218 | uf | 1.847 | 2.602 | 7  | 1526 | 1519 |
| 219 | uf | 1.986 | 2.772 | 15 | 1692 | 1677 |
| 220 | uf | 1.949 | 2.733 | 42 | 1901 | 1858 |

|     |    |       |       |    |      |      |
|-----|----|-------|-------|----|------|------|
| 221 | uf | 1.819 | 2.572 | 6  | 1506 | 1500 |
| 222 | uf | 1.939 | 2.546 | 14 | 1641 | 1627 |
| 223 | uf | 1.910 | 2.557 | 17 | 1618 | 1601 |
| 224 | uf | 1.939 | 2.593 | 14 | 1620 | 1605 |
| 225 | uf | 1.982 | 2.580 | 13 | 1737 | 1724 |
| 226 | uf | 1.904 | 2.601 | 12 | 2043 | 2031 |
| 227 | uf | 1.928 | 2.416 | 10 | 2013 | 2003 |
| 228 | uf | 1.972 | 2.484 | 14 | 2040 | 2026 |
| 229 | r  | 1.806 | 2.324 |    |      |      |
| 230 | r  | 1.864 | 2.276 |    |      |      |
| 231 | r  | 1.955 | 2.557 |    |      |      |
| 232 | r  | 2.010 | 2.419 |    |      |      |
| 233 | r  | 2.096 | 2.412 |    |      |      |
| 234 | r  | 1.817 | 3.242 |    |      |      |
| 235 | r  | 1.967 | 2.442 |    |      |      |
| 236 | r  | 2.018 | 2.583 |    |      |      |
| 237 | r  | 2.087 | 3.263 |    |      |      |
| 238 | r  | 2.009 | 2.393 |    |      |      |
| 239 | r  | 1.975 | 2.114 |    |      |      |
| 240 | r  | 2.044 | 2.108 |    |      |      |
| 241 | r  | 2.043 | 2.661 |    |      |      |
| 242 | r  | 2.091 | 2.242 |    |      |      |
| 243 | r  | 1.976 | 2.544 |    |      |      |
| 244 | r  | 2.081 | 3.083 |    |      |      |
| 245 | r  | 1.975 | 2.114 |    |      |      |
| 246 | r  | 1.844 | 2.750 |    |      |      |
| 247 | r  | 2.064 | 3.001 |    |      |      |
| 248 | r  | 2.096 | 2.724 |    |      |      |
| 249 | r  | 2.006 | 2.877 |    |      |      |
| 250 | np | 1.983 | 2.868 |    |      |      |
| 251 | np | 1.906 | 2.754 |    |      |      |
| 252 | np | 1.927 | 2.612 |    |      |      |
| 253 | np | 1.941 | 2.660 |    |      |      |
| 254 | np | 2.028 | 2.298 |    |      |      |
| 255 | np | 2.050 | 1.983 |    |      |      |
| 256 | np | 1.993 | 2.429 |    |      |      |



## 5. Cartesian Coordinates of the systems studied in this paper

Cartesian coordinates using B3LYP combined with the 6-311+G(d,p) basis set. Optimized geometries are given below in standard XYZ format. Each case shows the total number of atoms before the cartesian coordinate.

### Isolated reactants

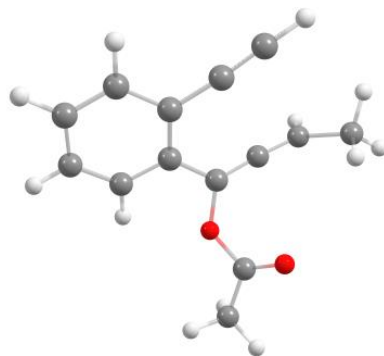

**Figure S11:** Enyne unsubstituted (R1: H and R2: H) computed structure.

```
#p opt freq Ub3lyp/6-311+G(d,p) nosymm int=(grid=ultrafine)
```

```
-----  
SCF Done = -691.237912098  
Zero-point correction = 0.215489 (Hartree/Particle)  
Thermal correction to Energy = 0.232625  
Thermal correction to Enthalpy = 0.232625  
Thermal correction to Gibbs Free Energy = 0.169523  
Sum of electronic and zero-point Energies = -691.022423  
Sum of electronic and thermal Energies = -691.006231  
Sum of electronic and thermal Enthalpies = -691.005287  
Sum of electronic and thermal Free Energies = -691.068389
```

```
28  
C -1.186337000 -2.944890000 -1.874542000  
C 0.193634000 -2.749227000 -1.897562000  
C 0.741336000 -1.608231000 -1.324068000  
C -0.063721000 -0.632965000 -0.717746000  
C -1.464907000 -0.837593000 -0.684320000  
C -2.001905000 -1.997119000 -1.272438000  
C 0.588534000 0.566974000 -0.155608000  
O 1.929963000 0.365436000 0.274516000  
C -2.374149000 0.060055000 -0.048212000  
C -3.214301000 0.745670000 0.477221000  
H -3.939834000 1.361389000 0.949171000  
C 0.121302000 1.788269000 -0.120768000  
C -0.298156000 3.021264000 -0.093266000
```

|   |              |              |              |
|---|--------------|--------------|--------------|
| C | -1.080080000 | 3.649458000  | 1.029959000  |
| C | 2.118765000  | -0.068835000 | 1.560696000  |
| H | -3.074367000 | -2.143472000 | -1.234006000 |
| H | -1.624016000 | -3.832032000 | -2.317273000 |
| H | 1.812261000  | -1.453448000 | -1.351592000 |
| H | 0.842685000  | -3.481260000 | -2.364497000 |
| H | -0.546932000 | 4.522000000  | 1.421179000  |
| H | -2.051060000 | 4.000801000  | 0.665413000  |
| H | -1.243850000 | 2.943215000  | 1.843241000  |
| O | 1.225215000  | -0.256438000 | 2.339359000  |
| C | 3.588262000  | -0.264671000 | 1.828962000  |
| H | 4.139627000  | 0.646888000  | 1.590091000  |
| H | 3.732298000  | -0.530254000 | 2.874107000  |
| H | 3.977211000  | -1.061138000 | 1.189682000  |
| H | -0.079683000 | 3.656227000  | -0.952726000 |

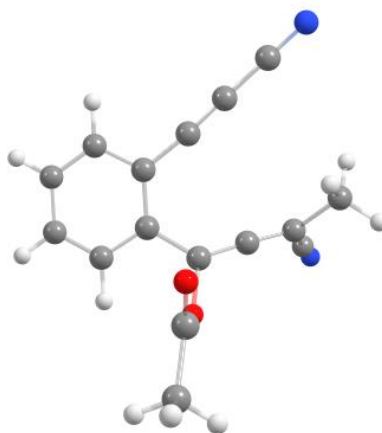

**Figure S12:** Enyne substituted (R1: CN and R2: CN) computed structure.

#p opt freq Ub3lyp/6-311+G(d,p) nosymm int=(grid=ultrafine)

```

-----
SCF Done = -875.772233193
Zero-point correction = 0.214154 (Hartree/Particle)
Thermal correction to Energy = 0.233811
Thermal correction to Enthalpy = 0.234755
Thermal correction to Gibbs Free Energy = 0.162502
Sum of electronic and zero-point Energies = -875.558079
Sum of electronic and thermal Energies = -875.538423
Sum of electronic and thermal Enthalpies = -875.537478
Sum of electronic and thermal Free Energies = -875.609731

```

|    |              |              |              |
|----|--------------|--------------|--------------|
| 30 |              |              |              |
| C  | -0.601421000 | -3.350250000 | -2.078499000 |
| C  | 0.771995000  | -3.114298000 | -2.034251000 |

|   |              |              |              |
|---|--------------|--------------|--------------|
| C | 1.267840000  | -2.001993000 | -1.363690000 |
| C | 0.411200000  | -1.097140000 | -0.725938000 |
| C | -0.982945000 | -1.343409000 | -0.760358000 |
| C | -1.469520000 | -2.472776000 | -1.445802000 |
| C | 1.003020000  | 0.084371000  | -0.064061000 |
| O | 2.299309000  | -0.101796000 | 0.463052000  |
| C | -1.929891000 | -0.519293000 | -0.098459000 |
| C | -2.809951000 | 0.109746000  | 0.447279000  |
| C | 0.505588000  | 1.292254000  | -0.027994000 |
| C | 0.066709000  | 2.528813000  | -0.000327000 |
| C | -0.811216000 | 3.100673000  | 1.093985000  |
| C | 2.383838000  | -0.685420000 | 1.711268000  |
| H | -2.537409000 | -2.651548000 | -1.460014000 |
| H | -0.993745000 | -4.215599000 | -2.599015000 |
| H | 2.333834000  | -1.815476000 | -1.341646000 |
| H | 1.458080000  | -3.793448000 | -2.526686000 |
| H | -0.322306000 | 3.967253000  | 1.546755000  |
| H | -1.765810000 | 3.435389000  | 0.680238000  |
| H | -0.996230000 | 2.353033000  | 1.863235000  |
| O | 1.420528000  | -0.999659000 | 2.350552000  |
| C | 3.824538000  | -0.842882000 | 2.110044000  |
| H | 4.337042000  | -1.498799000 | 1.402402000  |
| H | 4.327529000  | 0.125949000  | 2.081826000  |
| H | 3.876867000  | -1.265037000 | 3.111143000  |
| C | -3.785293000 | 0.834781000  | 1.064976000  |
| N | -4.612161000 | 1.457028000  | 1.590301000  |
| C | 0.434042000  | 3.413568000  | -1.072067000 |
| N | 0.709182000  | 4.153593000  | -1.915755000 |

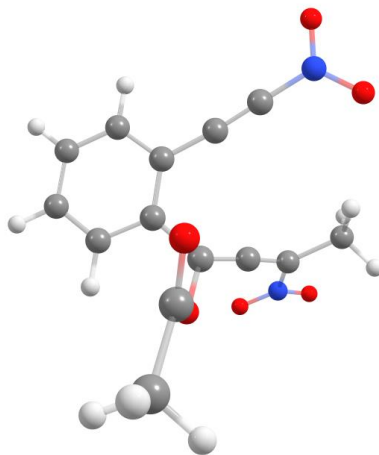

**Figure S13:** Enyne substituted (R1: NO<sub>2</sub> and R2: NO<sub>2</sub>) computed structure.

#p opt freq Ub3lyp/6-311+G(d,p) nosymm int=(grid=ultrafine)

---

|                         |                             |
|-------------------------|-----------------------------|
| SCF Done =              | -1100.34035602              |
| Zero-point correction = | 0.221168 (Hartree/Particle) |

Thermal correction to Energy = 0.242619  
 Thermal correction to Enthalpy = 0.243563  
 Thermal correction to Gibbs Free Energy = 0.165980  
 Sum of electronic and zero-point Energies = -1100.119188  
 Sum of electronic and thermal Energies = -1100.097737  
 Sum of electronic and thermal Enthalpies = -1100.096793  
 Sum of electronic and thermal Free Energies = -1100.174376

32

|   |              |              |              |
|---|--------------|--------------|--------------|
| C | -0.347619000 | -3.438325000 | -2.276377000 |
| C | 1.018246000  | -3.155481000 | -2.265218000 |
| C | 1.508787000  | -2.098394000 | -1.505820000 |
| C | 0.649053000  | -1.299221000 | -0.746543000 |
| C | -0.734800000 | -1.593534000 | -0.744659000 |
| C | -1.216147000 | -2.664770000 | -1.520789000 |
| C | 1.228877000  | -0.163361000 | 0.003862000  |
| O | 2.450580000  | -0.402664000 | 0.652770000  |
| C | -1.664130000 | -0.881226000 | 0.056440000  |
| C | -2.515603000 | -0.350181000 | 0.724381000  |
| C | 0.780807000  | 1.063694000  | -0.018779000 |
| C | 0.397184000  | 2.307511000  | -0.092772000 |
| C | -0.553470000 | 3.042282000  | 0.796056000  |
| C | 2.414894000  | -1.207285000 | 1.776714000  |
| H | -2.276890000 | -2.881908000 | -1.506219000 |
| H | -0.732077000 | -4.260518000 | -2.867762000 |
| H | 2.567698000  | -1.871691000 | -1.511566000 |
| H | 1.702574000  | -3.753946000 | -2.855183000 |
| H | -0.040444000 | 3.862299000  | 1.303986000  |
| H | -1.365618000 | 3.479722000  | 0.210966000  |
| H | -0.972887000 | 2.362309000  | 1.535586000  |
| O | 1.397439000  | -1.658889000 | 2.218719000  |
| C | 3.802863000  | -1.394413000 | 2.319957000  |
| H | 4.439809000  | -1.861331000 | 1.565299000  |
| H | 4.240296000  | -0.423304000 | 2.561709000  |
| H | 3.759618000  | -2.017915000 | 3.210136000  |
| N | 1.006885000  | 3.124499000  | -1.209898000 |
| O | 1.737456000  | 2.562483000  | -2.009499000 |
| O | 0.713637000  | 4.310879000  | -1.229928000 |
| N | -3.479492000 | 0.266729000  | 1.506807000  |
| O | -3.099807000 | 1.154860000  | 2.270388000  |
| O | -4.638774000 | -0.117473000 | 1.377615000  |

### Transition states (TS)

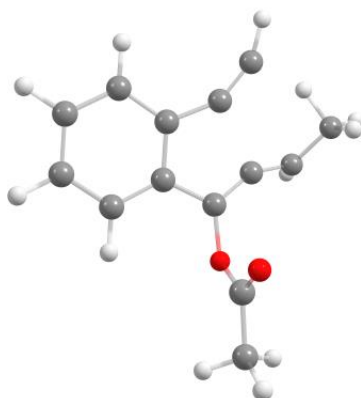

**Figure S14:** Transition state structure of the unsubstituted system (R1: H and R2: H).

```
#p opt=(calcfc,ts,tight,noeigentest) freq ub3lyp/6-311+G(d,p) nosymm int=(grid=ultrafine)
```

```
-----
SCF Done = -691.193959684
Zero-point correction = 0.212352 (Hartree/Particle)
Thermal correction to Energy = 0.227828
Thermal correction to Enthalpy = 0.227828
Thermal correction to Gibbs Free Energy = 0.169353
Sum of electronic and zero-point Energies = -690.981608
Sum of electronic and thermal Energies = -690.967076
Sum of electronic and thermal Enthalpies = -690.966132
Sum of electronic and thermal Free Energies = -691.024607
```

```
28
C -0.507417000 -4.078537000 -1.540585000
C 0.881578000 -4.172287000 -1.426480000
C 1.622215000 -3.114044000 -0.901946000
C 0.960705000 -1.958335000 -0.491020000
C -0.440298000 -1.861271000 -0.597833000
C -1.172492000 -2.923409000 -1.131139000
C 1.552749000 -0.747629000 0.062007000
O 2.912434000 -0.734289000 0.393624000
C -1.024149000 -0.630785000 -0.101531000
C -2.030581000 0.038377000 0.220029000
H -3.078243000 0.127096000 0.418041000
C 0.758375000 0.303125000 0.223613000
C 0.556108000 1.631002000 0.386006000
C -0.509704000 2.091066000 1.234748000
C 3.276755000 -1.125646000 1.660601000
H -2.250271000 -2.848122000 -1.212559000
H -1.073791000 -4.909870000 -1.944264000
H 2.701009000 -3.179974000 -0.826120000
H 1.388609000 -5.074088000 -1.750509000
H -0.717613000 3.158784000 1.206266000
H -1.433250000 1.463354000 0.754103000
H -0.518186000 1.693068000 2.249237000
```

|   |             |              |              |
|---|-------------|--------------|--------------|
| O | 2.492933000 | -1.466796000 | 2.500927000  |
| C | 4.771950000 | -1.040172000 | 1.813624000  |
| H | 5.090949000 | -0.000403000 | 1.708300000  |
| H | 5.057327000 | -1.416288000 | 2.793680000  |
| H | 5.267422000 | -1.615265000 | 1.028828000  |
| H | 0.925250000 | 2.294874000  | -0.395658000 |

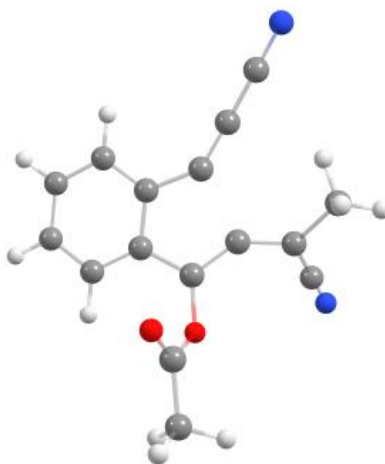

**Figure S15:** Transition state structure of the substituted system with R1: CN and R2: CN.

```
#p opt=(calcfc,ts,tight,noeigentest) freq ub3lyp/6-311+G(d,p) nosymm int=(grid=ultrafine)
```

```
-----
SCF Done = -875.738365474
Zero-point correction = 0.212419 (Hartree/Particle)
Thermal correction to Energy = 0.231155
Thermal correction to Enthalpy = 0.232099
Thermal correction to Gibbs Free Energy = 0.163161
Sum of electronic and zero-point Energies = -875.525946
Sum of electronic and thermal Energies = -875.507211
Sum of electronic and thermal Enthalpies = -875.506266
Sum of electronic and thermal Free Energies = -875.575205
```

```
30
C -0.386689000 -4.027791000 -1.740069000
C 1.009377000 -4.055083000 -1.648285000
C 1.701263000 -3.007276000 -1.047759000
C 0.979153000 -1.928927000 -0.537220000
C -0.425662000 -1.901043000 -0.625349000
C -1.112091000 -2.947831000 -1.241545000
C 1.481443000 -0.730950000 0.098647000
O 2.791597000 -0.619582000 0.512957000
C -1.053247000 -0.728080000 -0.039394000
C -2.187516000 -0.254587000 0.208000000
C 0.583977000 0.251731000 0.312691000
C 0.510376000 1.595100000 0.481894000
C -0.549968000 2.234354000 1.317125000
```

|   |              |              |              |
|---|--------------|--------------|--------------|
| C | 3.205227000  | -1.327588000 | 1.636666000  |
| H | -2.192676000 | -2.924700000 | -1.308901000 |
| H | -0.911574000 | -4.859407000 | -2.195188000 |
| H | 2.783183000  | -3.017356000 | -0.995887000 |
| H | 1.556757000  | -4.899661000 | -2.050002000 |
| H | -0.490218000 | 3.321068000  | 1.297395000  |
| H | -1.530247000 | 1.921935000  | 0.919237000  |
| H | -0.514627000 | 1.880446000  | 2.349803000  |
| O | 2.455740000  | -1.984772000 | 2.296425000  |
| C | 4.671674000  | -1.103639000 | 1.864676000  |
| H | 5.239901000  | -1.399909000 | 0.980403000  |
| H | 4.858603000  | -0.040024000 | 2.029525000  |
| H | 4.994027000  | -1.677838000 | 2.730328000  |
| C | -3.412787000 | 0.222561000  | 0.509554000  |
| N | -4.480104000 | 0.622517000  | 0.763908000  |
| C | 1.374349000  | 2.428056000  | -0.284934000 |
| N | 2.081811000  | 3.126298000  | -0.879817000 |

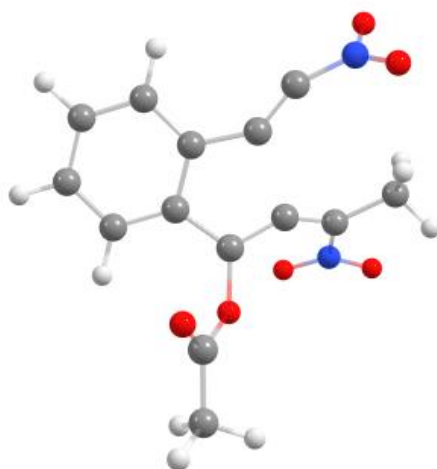

**Figure S16:** First transition state structure of the substituted system with R1: NO<sub>2</sub> and R2: NO<sub>2</sub>.

```
#p opt=(calcfc,ts,tight,noeigentest) freq ub3lyp/6-311+G(d,p) nosymm int=(grid=ultrafine)
```

```
-----
SCF Done = -1100.30960370
Zero-point correction = 0.219529 (Hartree/Particle)
Thermal correction to Energy = 0.240044
Thermal correction to Enthalpy = 0.240988
Thermal correction to Gibbs Free Energy = 0.167268
Sum of electronic and zero-point Energies = -1100.090075
Sum of electronic and thermal Energies = -1100.069560
Sum of electronic and thermal Enthalpies = -1100.068616
Sum of electronic and thermal Free Energies = -1100.142335
```

32

|   |              |              |              |
|---|--------------|--------------|--------------|
| C | -0.265455000 | -4.034336000 | -1.808395000 |
|---|--------------|--------------|--------------|

|   |              |              |              |
|---|--------------|--------------|--------------|
| C | 1.135669000  | -3.988251000 | -1.713656000 |
| C | 1.761345000  | -2.950177000 | -1.044081000 |
| C | 0.974869000  | -1.946537000 | -0.463293000 |
| C | -0.433692000 | -1.996661000 | -0.548815000 |
| C | -1.053738000 | -3.038498000 | -1.248886000 |
| C | 1.418471000  | -0.755899000 | 0.205219000  |
| O | 2.684730000  | -0.585550000 | 0.684512000  |
| C | -1.143678000 | -0.930266000 | 0.116190000  |
| C | -2.309900000 | -0.586806000 | 0.426037000  |
| C | 0.471360000  | 0.202095000  | 0.403614000  |
| C | 0.337533000  | 1.526342000  | 0.395986000  |
| C | -0.699666000 | 2.354909000  | 1.064802000  |
| C | 3.211802000  | -1.477238000 | 1.629196000  |
| H | -2.133232000 | -3.071660000 | -1.321345000 |
| H | -0.738729000 | -4.863596000 | -2.321139000 |
| H | 2.841656000  | -2.897814000 | -0.992776000 |
| H | 1.729522000  | -4.768984000 | -2.173623000 |
| H | -0.222399000 | 3.181973000  | 1.594169000  |
| H | -1.380785000 | 2.801444000  | 0.332980000  |
| H | -1.267490000 | 1.757528000  | 1.774236000  |
| O | 2.566374000  | -2.355012000 | 2.114241000  |
| C | 4.637092000  | -1.110010000 | 1.913775000  |
| H | 5.211987000  | -1.079827000 | 0.985984000  |
| H | 4.674318000  | -0.109512000 | 2.351407000  |
| H | 5.064509000  | -1.833079000 | 2.604718000  |
| N | 1.336019000  | 2.307741000  | -0.432933000 |
| O | 2.052062000  | 1.703192000  | -1.214807000 |
| O | 1.355580000  | 3.517386000  | -0.249034000 |
| N | -3.256659000 | 0.285514000  | 0.890175000  |
| O | -3.314891000 | 0.470787000  | 2.114087000  |
| O | -4.007727000 | 0.807499000  | 0.057689000  |

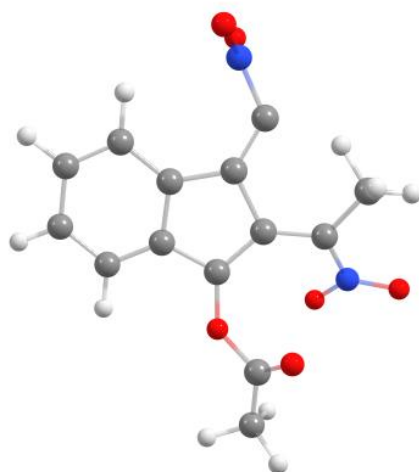

**Figure S17:** Second transition state structure of the substituted system with R1: NO<sub>2</sub> and R2: NO<sub>2</sub>.



#p opt=(calcfc,ts,tight,noeigentest) freq ub3lyp/6-311+G(d,p) nosymm int=(grid=ultrafine)

-----  
SCF Done = -1100.33867421  
Zero-point correction = 0.219313 (Hartree/Particle)  
Thermal correction to Energy = 0.238367  
Thermal correction to Enthalpy = 0.239312  
Thermal correction to Gibbs Free Energy = 0.170416  
Sum of electronic and zero-point Energies = -1100.119361  
Sum of electronic and thermal Energies = -1100.100307  
Sum of electronic and thermal Enthalpies = -1100.099363  
Sum of electronic and thermal Free Energies = -1100.168258

32  
C -1.191575000 -3.534991000 -1.709207000  
C 0.198546000 -3.756861000 -1.608972000  
C 1.025799000 -2.796784000 -1.059570000  
C 0.437773000 -1.601645000 -0.607436000  
C -0.961029000 -1.377761000 -0.703195000  
C -1.780288000 -2.353766000 -1.273704000  
C 1.038530000 -0.468658000 0.008751000  
O 2.351961000 -0.522266000 0.282674000  
C -1.268851000 -0.060842000 -0.148168000  
C -2.403916000 0.638523000 -0.173632000  
C 0.061231000 0.525640000 0.273803000  
C 0.140623000 1.835554000 0.709532000  
C -1.003127000 2.550151000 1.215778000  
C 2.951962000 0.077984000 1.406477000  
H -2.849584000 -2.213870000 -1.358549000  
H -1.818374000 -4.311736000 -2.132158000  
H 2.096896000 -2.941667000 -0.994359000  
H 0.615013000 -4.688900000 -1.971722000  
H -0.884538000 3.628602000 1.241896000  
H -1.877334000 2.167357000 0.533449000  
H -1.351880000 2.161137000 2.176131000  
O 2.312875000 0.503380000 2.317637000  
C 4.437552000 0.044473000 1.247633000  
H 4.714446000 0.730373000 0.442492000  
H 4.906990000 0.358137000 2.177220000  
H 4.771287000 -0.955402000 0.965534000  
N 1.380075000 2.629885000 0.474764000  
O 2.210007000 2.188346000 -0.314726000  
O 1.490577000 3.676659000 1.093129000  
N -3.645840000 0.156397000 -0.616025000  
O -4.352035000 -0.448702000 0.199127000  
O -3.987431000 0.434801000 -1.769924000

**Intermediate (Int)**

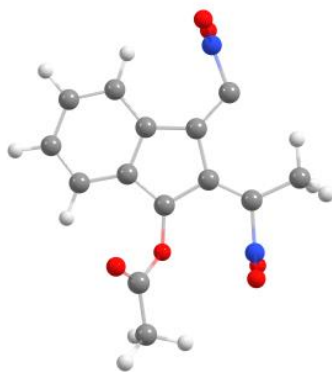

**Figure S18:** Intermediate compute the structure of the substituted system with R1: NO<sub>2</sub> and R2: NO<sub>2</sub>.

# opt freq Ub3lyp/6-311+G(d,p) nosymm int=(grid=ultrafine)

```
-----
SCF Done = -1100.34599062
Zero-point correction = 0.222467 (Hartree/Particle)
Thermal correction to Energy = 0.239648
Thermal correction to Enthalpy = 0.240592
Thermal correction to Gibbs Free Energy = 0.176392
Sum of electronic and zero-point Energies = -1100.123524
Sum of electronic and thermal Energies = -1100.105399
Sum of electronic and thermal Enthalpies = -1100.099363
Sum of electronic and thermal Free Energies = -1100.169598
```

```
32
C -1.097790000 -3.537917000 -1.042719000
C 0.292213000 -3.707481000 -0.783645000
C 1.060234000 -2.641982000 -0.424999000
C 0.428851000 -1.374467000 -0.326729000
C -0.968895000 -1.197708000 -0.585954000
C -1.731432000 -2.323723000 -0.951250000
C 0.961718000 -0.133332000 -0.023619000
O 2.241935000 0.146923000 0.245171000
C -1.331182000 0.189380000 -0.426828000
C -2.538302000 0.812153000 -0.493228000
C -0.063266000 0.885468000 -0.089062000
C 0.144433000 2.202033000 0.110787000
C -0.810876000 3.331727000 0.048885000
C 2.843142000 -0.339779000 1.422213000
H -2.787735000 -2.243404000 -1.165884000
H -1.677904000 -4.408988000 -1.326975000
H 2.118063000 -2.747217000 -0.219674000
H 0.729547000 -4.694004000 -0.874780000
H -0.536182000 3.980496000 -0.789597000
H -1.821987000 2.950882000 -0.090713000
H -0.740561000 3.920776000 0.968246000
O 2.261906000 -1.056249000 2.167103000
```

|   |              |              |              |
|---|--------------|--------------|--------------|
| C | 4.216521000  | 0.227474000  | 1.532670000  |
| H | 4.136676000  | 1.313915000  | 1.622473000  |
| H | 4.707229000  | -0.187834000 | 2.409792000  |
| H | 4.786790000  | 0.007276000  | 0.628364000  |
| N | 1.521935000  | 2.669946000  | 0.416743000  |
| O | 2.176075000  | 3.076871000  | -0.513478000 |
| O | 1.853718000  | 2.664769000  | 1.583435000  |
| N | -3.653492000 | 0.000469000  | -0.756609000 |
| O | -4.258429000 | -0.464873000 | 0.202675000  |
| O | -4.002354000 | -0.127949000 | -1.926254000 |

### Isolated Products

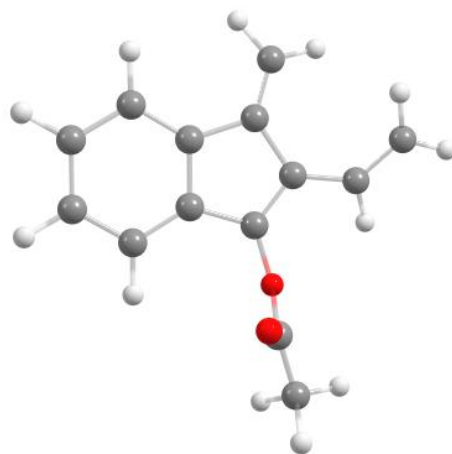

**Figure S19:** Allene unsubstituted (R1: H and R2: H) computed structure.

# opt freq Ub3lyp/6-311+G(d,p) nosymm int=(grid=ultrafine)

---

|                                             |                             |
|---------------------------------------------|-----------------------------|
| SCF Done =                                  | -691.314153636              |
| Zero-point correction =                     | 0.219121 (Hartree/Particle) |
| Thermal correction to Energy =              | 0.233737                    |
| Thermal correction to Enthalpy =            | 0.234681                    |
| Thermal correction to Gibbs Free Energy =   | 0.176248                    |
| Sum of electronic and zero-point Energies = | -691.095033                 |
| Sum of electronic and thermal Energies =    | -691.080416                 |
| Sum of electronic and thermal Enthalpies =  | -691.079472                 |

Sum of electronic and thermal Free Energies = -691.137905

|    |              |              |              |
|----|--------------|--------------|--------------|
| 28 |              |              |              |
| C  | -1.528037000 | -2.936965000 | -1.677062000 |
| C  | -0.156638000 | -3.101913000 | -1.470750000 |
| C  | 0.614016000  | -2.071706000 | -0.926625000 |
| C  | -0.019849000 | -0.879226000 | -0.595014000 |
| C  | -1.403300000 | -0.705052000 | -0.807848000 |
| C  | -2.161111000 | -1.732928000 | -1.349264000 |
| C  | 0.472815000  | 0.368272000  | -0.025795000 |
| O  | 1.802782000  | 0.620387000  | 0.249024000  |
| C  | -1.764994000 | 0.673941000  | -0.396542000 |
| C  | -2.962918000 | 1.247993000  | -0.574734000 |
| H  | -3.786074000 | 0.690915000  | -1.007118000 |
| C  | -0.519844000 | 1.290579000  | 0.126927000  |
| C  | -0.313279000 | 2.615046000  | 0.691096000  |
| C  | -1.219219000 | 3.413899000  | 1.270940000  |
| C  | 2.404312000  | -0.026156000 | 1.308440000  |
| H  | -3.226296000 | -1.616978000 | -1.516753000 |
| H  | -2.108902000 | -3.751285000 | -2.094741000 |
| H  | 1.676532000  | -2.207447000 | -0.763774000 |
| H  | 0.314508000  | -4.042630000 | -1.732017000 |
| H  | -0.926186000 | 4.380027000  | 1.664180000  |
| H  | -3.152687000 | 2.282219000  | -0.324470000 |
| H  | -2.254775000 | 3.129820000  | 1.405813000  |
| O  | 1.821146000  | -0.777841000 | 2.035991000  |
| C  | 3.853591000  | 0.367103000  | 1.392211000  |
| H  | 3.936541000  | 1.446218000  | 1.540656000  |
| H  | 4.322936000  | -0.158487000 | 2.220830000  |
| H  | 4.362481000  | 0.126056000  | 0.456377000  |
| H  | 0.717627000  | 2.958545000  | 0.652951000  |

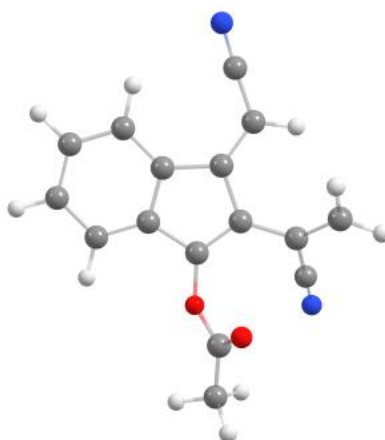

**Figure S20:** Allene substituted (R1: CN and R2: CN) computed structure.

# opt freq Ub3lyp/6-311+G(d,p) nosymm int=(grid=ultrafine)

```

-----
SCF Done = 875.843777374
Zero-point correction = 0.216990 (Hartree/Particle)
Thermal correction to Energy = 0.234866
Thermal correction to Enthalpy = 0.235810
Thermal correction to Gibbs Free Energy = 0.170113
Sum of electronic and zero-point Energies = -875.626788
Sum of electronic and thermal Energies = -875.608912
Sum of electronic and thermal Enthalpies = -875.607968
Sum of electronic and thermal Free Energies = -875.673664

```

30

|   |              |              |              |
|---|--------------|--------------|--------------|
| C | -1.504584000 | -3.279325000 | -1.626368000 |
| C | -0.136896000 | -3.536264000 | -1.548236000 |
| C | 0.742582000  | -2.576672000 | -1.033497000 |
| C | 0.210666000  | -1.369676000 | -0.606856000 |
| C | -1.171329000 | -1.099433000 | -0.686201000 |
| C | -2.038289000 | -2.056050000 | -1.197130000 |
| C | 0.852424000  | -0.197955000 | -0.018820000 |
| O | 2.206846000  | -0.168555000 | 0.129309000  |
| C | -1.384545000 | 0.272344000  | -0.170915000 |
| C | -2.524377000 | 1.002376000  | -0.173683000 |
| C | -0.062792000 | 0.773549000  | 0.267356000  |
| C | 0.202848000  | 2.094993000  | 0.857581000  |
| C | -0.554075000 | 2.687479000  | 1.797096000  |
| C | 2.798207000  | 0.102799000  | 1.365536000  |
| H | -3.103033000 | -1.878169000 | -1.266608000 |
| H | -2.170181000 | -4.035703000 | -2.025230000 |
| H | 1.807124000  | -2.768213000 | -0.974014000 |
| H | 0.250077000  | -4.489206000 | -1.890120000 |
| H | -0.302416000 | 3.668597000  | 2.178118000  |
| H | -2.512327000 | 2.028310000  | 0.174952000  |
| H | -1.415393000 | 2.187604000  | 2.219957000  |
| O | 2.164249000  | 0.201119000  | 2.372986000  |
| C | 4.279711000  | 0.241263000  | 1.192676000  |
| H | 4.674656000  | -0.570003000 | 0.579541000  |
| H | 4.480803000  | 1.182181000  | 0.672996000  |
| H | 4.757672000  | 0.253630000  | 2.169773000  |
| C | -3.782188000 | 0.538553000  | -0.631942000 |
| N | -4.828510000 | 0.196901000  | -0.990457000 |
| C | 1.378059000  | 2.782388000  | 0.390807000  |
| N | 2.336426000  | 3.309682000  | 0.018896000  |

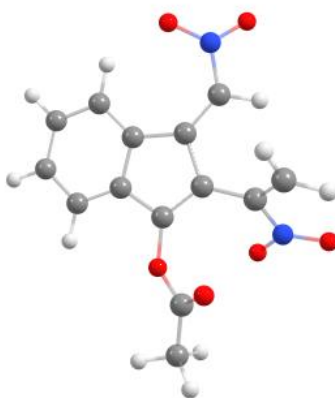

**Figure S21:** Allene substituted (R1: NO<sub>2</sub> and R2: NO<sub>2</sub>) computed structure.

# opt freq Ub3lyp/6-311+G(d,p) nosymm int=(grid=ultrafine)

```
-----
SCF Done = -1100.42674679
Zero-point correction = 0.224657 (Hartree/Particle)
Thermal correction to Energy = 0.244042
Thermal correction to Enthalpy = 0.244986
Thermal correction to Gibbs Free Energy = 0.174556
Sum of electronic and zero-point Energies = -1100.202089
Sum of electronic and thermal Energies = -1100.182705
Sum of electronic and thermal Enthalpies = -1100.181761
Sum of electronic and thermal Free Energies = -1100.252191
```

```
32
C -1.461815000 -3.496683000 -1.777926000
C -0.116362000 -3.818580000 -1.626502000
C 0.764669000 -2.909870000 -1.029732000
C 0.256383000 -1.694324000 -0.602743000
C -1.104312000 -1.352884000 -0.750945000
C -1.971880000 -2.265694000 -1.341224000
C 0.942145000 -0.583377000 0.052107000
O 2.275707000 -0.720991000 0.247425000
C -1.258913000 0.027706000 -0.222886000
C -2.274569000 0.917480000 -0.242661000
C 0.075279000 0.442257000 0.299836000
C 0.303993000 1.743548000 0.933576000
C -0.360484000 2.249507000 1.969718000
C 2.959936000 -0.144238000 1.311977000
H -3.021649000 -2.046726000 -1.450694000
H -2.135875000 -4.209639000 -2.238048000
H 1.815373000 -3.142796000 -0.909174000
H 0.251914000 -4.777687000 -1.971763000
H -0.135155000 3.239606000 2.341057000
H -2.138940000 1.942623000 0.063982000
```

|   |              |              |              |
|---|--------------|--------------|--------------|
| H | -1.120924000 | 1.662263000  | 2.466996000  |
| O | 2.401014000  | 0.330839000  | 2.255893000  |
| C | 4.435653000  | -0.243977000 | 1.076050000  |
| H | 4.706658000  | 0.440895000  | 0.267965000  |
| H | 4.967001000  | 0.031756000  | 1.984234000  |
| H | 4.707883000  | -1.252853000 | 0.761979000  |
| N | 1.386114000  | 2.607684000  | 0.344195000  |
| O | 2.106579000  | 2.090578000  | -0.501312000 |
| O | 1.495552000  | 3.754689000  | 0.743597000  |
| N | -3.618866000 | 0.723432000  | -0.741100000 |
| O | -4.123772000 | -0.395897000 | -0.739968000 |
| O | -4.192861000 | 1.745008000  | -1.111985000 |

## 6. References

- [1] A. D. Becke, *J. Chem. Phys.* **1993**, *98*, 5648–5652.
- [2] C. Lee, W. Yang, R. G. Parr, *Phys. Rev. B* **1988**, *37*, 785–789.
- [3] M. K. Waddell, T. Bekele, M. A. Lipton, *J. Org. Chem.* **2006**, *71*, 8372–8377.
- [4] M. Schmittel, C. Vavilala, M. E. Cinar, *J. Phys. Org. Chem.* **2012**, *25*, 182–197.
- [5] S. Grimme, *J. Chem. Phys.* **2003**, *118*, 9095–9102.
- [6] C. Riplinger, B. Sandhoefer, A. Hansen, F. Neese, *J. Chem. Phys.* **2013**, *139*, 134101.
- [7] A. P. Scott, L. Radom, *J. Phys. Chem.* **1996**, *100*, 16502–16513.
- [8] C. Gonzalez, H. B. Schlegel, *J. Phys. Chem.* **1990**, *94*, 5523–5527.
- [9] H. P. Hratchian, H. B. Schlegel, *J. Chem. Phys.* **2004**, *120*, 9918–9924.
- [10] H. P. Hratchian, H. B. Schlegel, *J. Chem. Theory Comput.* **2005**, *1*, 61–69.
- [11] H. Frisch, MJ Trucks, GW and Schlegel, HB and Scuseria, GE and Robb, MA and Cheeseman, JR and Scalmani, G and Barone, V and Petersson, GA and Nakatsuji, *Gaussian Inc., Wallingford CT* **2016**, DOI 111.
- [12] F. Neese, *Wiley Interdiscip. Rev. Comput. Mol. Sci.* **2012**, *2*, 73–78.
- [13] G. Zhurko, D. Zhurko, “ChemCraft, Version 1.8,” can be found under <http://www.chemcraftprog.com>, **2017**.
- [14] C. Legault, “CYLview , Version 1.0b <http://www.cylview.org>,” **2009**.
- [15] P. J. Stephens, F. J. Devlin, C. F. Chabalowski, M. J. Frisch, *J. Phys. Chem.* **1994**, *98*, 11623–11627.
- [16] Y. Zhao, D. G. Truhlar, *Theor. Chem. Acc.* **2008**, *120*, 215–241.
- [17] Y.-S. Lin, G.-D. Li, S.-P. Mao, J.-D. Chai, *J. Chem. Theory Comput.* **2013**, *9*, 263–272.
- [18] P. Jaque, A. Toro-Labbé, P. Politzer, P. Geerlings, *Chem. Phys. Lett.* **2008**, *456*, 135–140.
- [19] P. Politzer, J. S. Murray, P. Jaque, *J. Mol. Model.* **2013**, *19*, 4111–4118.
- [20] A. Toro-Labbé, *J. Phys. Chem. A* **1999**, *103*, 4398.
- [21] P. Politzer, J. R. Reimers, J. S. Murray, A. Toro-Labbé, *J. Phys. Chem. Lett.* **2010**, *1*, 2858.
